# Supplementary material for: Can Maternal Exposure to Air Pollution Affect Post-Natal Liver Development?
Source: MDPI journal article supplement (doi:10.3390/toxics11010061), 2023-01-09
Supplement: s1 [file s1]

**Supplementary Table S1:** Sex-stratified analysis of all data.

|                                                              | Group    | Female |              |                  | Male |              |                  |
|--------------------------------------------------------------|----------|--------|--------------|------------------|------|--------------|------------------|
|                                                              |          | n      | Value        | Overall <i>p</i> | n    | Value        | Overall <i>p</i> |
| <b>Weight</b><br>(mg)                                        | Control  | 13     | 6.47 (1.12)  | 0.422            | 12   | 6.92 (0.74)  | 0.330            |
|                                                              | Sample 1 | 13     | 5.95 (0.71)  |                  | 12   | 6.43 (0.88)  |                  |
|                                                              | Sample 2 | 12     | 6.27 (0.70)  |                  | 10   | 6.46 (0.69)  |                  |
|                                                              | Sample 3 | 12     | 6.28 (0.43)  |                  | 10   | 6.67 (0.38)  |                  |
| <b>SVL</b><br>(mm)                                           | Control  | 13     | 49.42 (2.96) | 0.449            | 12   | 50.97 (2.25) | 0.150            |
|                                                              | Sample 1 | 13     | 48.08 (2.59) |                  | 12   | 49.01 (2.44) |                  |
|                                                              | Sample 2 | 12     | 49.51 (1.85) |                  | 10   | 49.48 (2.45) |                  |
|                                                              | Sample 3 | 12     | 48.93 (2.25) |                  | 10   | 49.34 (1.35) |                  |
| <b>Glycogen</b><br>(pmol / mL)                               | Control  | 14     | 10.27 (3.71) | 0.460            | 12   | 11.48 (3.98) | 0.808            |
|                                                              | Sample 1 | 10     | 10.69 (2.29) |                  | 10   | 10.19 (3.52) |                  |
|                                                              | Sample 2 | 11     | 12.89 (3.27) |                  | 8    | 11.81 (4.99) |                  |
|                                                              | Sample 3 | 12     | 11.47 (6.24) |                  | 8    | 11.70 (3.70) |                  |
| <b>Lipid</b><br>(mm <sup>2</sup> )                           | Control  | 2      | 0.56 (0.11)  | 0.779            | 7    | 0.30 (0.32)  | 0.569            |
|                                                              | Sample 1 | 7      | 0.40 (0.34)  |                  | 6    | 0.23 (0.11)  |                  |
|                                                              | Sample 2 | 10     | 0.31 (0.14)  |                  | 5    | 0.43 (0.24)  |                  |
|                                                              | Sample 3 | 9      | 0.43 (0.52)  |                  | 3    | 0.33 (0.23)  |                  |
| <b>Protein carbonyl</b><br>(nmol / mg)                       | Control  | 11     | 1.16 (0.50)  | 0.847            | 11   | 0.99 (0.45)  | 0.209            |
|                                                              | Sample 1 | 9      | 1.24 (0.69)  |                  | 8    | 1.47 (0.77)  |                  |
|                                                              | Sample 2 | 12     | 1.18 (0.39)  |                  | 10   | 1.07 (0.28)  |                  |
|                                                              | Sample 3 | 12     | 1.33 (0.44)  |                  | 10   | 1.18 (0.43)  |                  |
| <b>MPO activity</b><br>(pmol / mL)                           | Control  | 12     | 1.91 (1.07)  | 0.806            | 10   | 2.02 (0.93)  | 0.264            |
|                                                              | Sample 1 | 10     | 2.06 (0.96)  |                  | 9    | 1.94 (1.11)  |                  |
|                                                              | Sample 2 | 10     | 2.43 (1.80)  |                  | 9    | 1.87 (0.68)  |                  |
|                                                              | Sample 3 | 12     | 2.10 (1.06)  |                  | 9    | 2.71 (1.19)  |                  |
| <b>IL-6</b><br>(Relative gene expression)                    | Control  | 12     | 0.99 (0.51)  | 0.593            | 11   | 1.53 (1.36)  | 0.548            |
|                                                              | Sample 1 | 10     | 1.53 (1.07)  |                  | 12   | 0.96 (0.55)  |                  |
|                                                              | Sample 2 | 11     | 1.30 (1.20)  |                  | 9    | 1.26 (0.95)  |                  |
|                                                              | Sample 3 | 10     | 1.20 (0.80)  |                  | 8    | 1.18 (0.62)  |                  |
| <b>IL-1<math>\beta</math></b><br>(Relative gene expression)  | Control  | 12     | 0.83 (0.62)  | 0.743            | 11   | 1.32 (0.83)  | 0.279            |
|                                                              | Sample 1 | 10     | 1.04 (0.94)  |                  | 12   | 0.71 (0.36)  |                  |
|                                                              | Sample 2 | 11     | 1.45 (2.36)  |                  | 9    | 1.12 (1.13)  |                  |
|                                                              | Sample 3 | 10     | 1.00 (0.76)  |                  | 8    | 1.16 (0.57)  |                  |
| <b>TNF-<math>\alpha</math></b><br>(Relative gene expression) | Control  | 12     | 0.91 (0.50)  | 0.508            | 11   | 1.20 (0.60)  | 0.755            |
|                                                              | Sample 1 | 10     | 0.69 (0.33)  |                  | 12   | 1.29 (0.86)  |                  |
|                                                              | Sample 2 | 11     | 0.98 (0.61)  |                  | 9    | 1.17 (0.81)  |                  |
|                                                              | Sample 3 | 10     | 1.03 (0.61)  |                  | 8    | 0.92 (0.77)  |                  |
| <b>TGF-<math>\beta</math>1</b>                               | Control  | 12     | 1.19 (1.01)  | 0.972            | 11   | 1.14 (0.47)  | 0.620            |

|                                             |          |    |               |       |    |              |       |
|---------------------------------------------|----------|----|---------------|-------|----|--------------|-------|
| (Relative gene expression)                  | Sample 1 | 10 | 1.20 (0.77)   |       | 12 | 1.24 (0.65)  |       |
|                                             | Sample 2 | 11 | 1.13 (0.45)   |       | 9  | 1.15 (0.48)  |       |
|                                             | Sample 3 | 10 | 1.06 (0.30)   |       | 8  | 1.46 (0.68)  |       |
| <i>TGF-β2</i><br>(Relative gene expression) | Control  | 12 | 1.16 (0.59)   | 0.691 | 11 | 1.03 (0.25)  | 0.930 |
|                                             | Sample 1 | 10 | 1.19 (0.58)   |       | 12 | 1.18 (0.59)  |       |
|                                             | Sample 2 | 11 | 0.92 (0.72)   |       | 9  | 1.14 (0.66)  |       |
|                                             | Sample 3 | 10 | 1.07 (0.31)   |       | 8  | 1.14 (0.58)  |       |
|                                             | Control  | 12 | 1.10 (0.47)   | 0.474 | 11 | 1.11 (0.42)  | 0.565 |
| <i>TGF-β3</i><br>(Relative gene expression) | Sample 1 | 10 | 0.83 (0.26)   |       | 12 | 1.35 (0.74)  |       |
|                                             | Sample 2 | 11 | 1.04 (0.36)   |       | 9  | 1.12 (0.46)  |       |
|                                             | Sample 3 | 10 | 0.94 (0.52)   |       | 8  | 1.03 (0.26)  |       |
|                                             | Control  | 9  | 7.42 (9.35)   | 0.097 | 8  | 8.34 (9.97)  | 0.338 |
|                                             | Sample 1 | 7  | 22.69 (11.20) |       | 8  | 14.91 (9.66) |       |
| <b>DNA damage</b><br>(AP sites)             | Sample 2 | 10 | 16.14 (10.45) |       | 8  | 11.24 (5.09) |       |
|                                             | Sample 3 | 6  | 15.87 (16.60) |       | 5  | 16.40 (9.97) |       |

Values are Mean (SD). SVL: snout-vent length, MPO: myeloperoxidase.
